# Supplementary material for: Discovery and Characterization of a Novel Tomato mlo Mutant from an EMS Mutagenized Micro-Tom Population
Source: MDPI journal article supplement (doi:10.3390/genes12050719), 2021-05-11
Supplement: s1 [file s1]

Article

# Discovery and Characterization of a Novel Tomato *mlo* Mutant from an EMS Mutagenized Micro-Tom Population

Zhe Yan <sup>†</sup>, Michela Appiano <sup>†</sup>, Ageeth van Tuinen, Fien Meijer-Dekens, Danny Schipper, Dongli Gao, Robin Huibers, Richard G. F. Visser, Yuling Bai and Anne-Marie A. Wolters <sup>\*</sup>

## Supplementary Materials

**Table S1.** Primer pairs used in this study.

| Primer name                | Forward primer (5' - 3') | Reverse primer (5' - 3') | PCR product size |
|----------------------------|--------------------------|--------------------------|------------------|
| <i>SIMLO1</i> _full-length | TTGACATTTCCCTTCTTCTTA    | TACAAAATCATTGCCATTGAA    | 1743 bp          |
| <i>SIMLO1</i> _seqA        |                          | CCCTTTCTGAAATCCTTACTCC   |                  |
| <i>SIMLO1</i> _seqB        |                          | TATTGCTAGTTGGCACAAAAC    |                  |
| HRM_marker                 | TGGCTAAAGCACGGTCTA       | CTGGATCTTGCAACACTGTCA    | 406 bp           |
| 35S_promoter               | GCTCCTACAAATGCCATCA      | GATAGTGGGATTGTGCGTCA     | 195 bp           |
| NPTII_marker               | TCGGCTATGACTGGGCACAAC    | AAGAAGGCGATAGAAGGCGA     | 722 bp           |
| <i>SIE1α</i>               | ACAGGCGTTCAGGTAAGGAA     | GAGGGTATTACAGCAAAGGTCTC  | 120 bp           |
| On_ITS                     | CGCCAAAGACCTAACCAAAA     | AGCCAAGAGATCCGTTGTG      | 90 bp            |

**Table S2.** Genotyping and phenotyping of eight progenies (BC<sub>1</sub>S<sub>1</sub>) derived from two (i.e. BC<sub>1\_1</sub> and BC<sub>1\_3</sub>) of the three BC<sub>1</sub> crosses M200 × MT.

| M200<br>x MT                         | Number of<br>susceptible<br>plants | Number of<br>resistant plants | Expected<br>3S:1R |      | HRM profiles        |              |                |
|--------------------------------------|------------------------------------|-------------------------------|-------------------|------|---------------------|--------------|----------------|
|                                      |                                    |                               | X <sup>2</sup>    | p    | Wild-type<br>allele | heterozygous | m200<br>allele |
| BC <sub>1</sub> S <sub>1_1</sub> -1  | 10                                 | 6                             | 2.07              | 0.15 | 2                   | 8            | 6              |
| BC <sub>1</sub> S <sub>1_1</sub> -2  | 13                                 | 4                             |                   |      | 4                   | 9            | 4              |
| BC <sub>1</sub> S <sub>1_1</sub> -4  | 13                                 | 6                             |                   |      | 3                   | 10           | 6              |
| BC <sub>1</sub> S <sub>1_1</sub> -10 | 12*                                | 7                             |                   |      | 4                   | 7            | 7              |
| BC <sub>1</sub> S <sub>1_3</sub> -1  | 14                                 | 4                             | 0.45              | 0.50 | 4                   | 10           | 4              |
| BC <sub>1</sub> S <sub>1_3</sub> -6  | 11                                 | 7                             |                   |      | 4                   | 7            | 7              |
| BC <sub>1</sub> S <sub>1_3</sub> -7  | 17                                 | 2                             |                   |      | 4                   | 13           | 2              |
| BC <sub>1</sub> S <sub>1_3</sub> -9  | 11                                 | 8                             |                   |      | 2                   | 9            | 8              |

S = susceptible, R = resistant.

\* One plant could not be genotyped with the HRM marker.

**Table S3.** Genotyping and phenotyping of the progenies (F<sub>2</sub>) of three crosses between the resistant M200 plant and the tomato cv Moneymaker (M200 × MM).

| M200<br>x MM     | Number of<br>susceptible plants | Number of<br>resistant plants | Expected<br>3S:1R |      | HRM marker profiles |              |                |
|------------------|---------------------------------|-------------------------------|-------------------|------|---------------------|--------------|----------------|
|                  |                                 |                               | X <sup>2</sup>    | p    | Wild-type allele    | heterozygous | m200<br>allele |
| F <sub>2_1</sub> | 25                              | 14                            | 2.47              | 0.12 | 9                   | 16           | 14             |
| F <sub>2_2</sub> | 27                              | 11                            | 0.32              | 0.57 | 11                  | 16           | 11             |
| F <sub>2_3</sub> | 25*                             | 14                            | 2.47              | 0.12 | 5                   | 19           | 14             |

S = susceptible, R = resistant.

\* One plant could not be genotyped with the HRM marker.

**Table S4.** Overview of the *mlo*-mutants described in the literature.

| Plant species                             | MLO gene       | Allele name              | Amino-acid exchange          | Location          | Origin                   | Reference     |
|-------------------------------------------|----------------|--------------------------|------------------------------|-------------------|--------------------------|---------------|
| Pea<br>( <i>Pisum sativum</i> )           | <i>PsMLO1</i>  | <i>er1-1</i>             | S227 → stop                  | 2IC               | natural origin           | [1]           |
|                                           |                | <i>er1-2</i>             | aberrant splicing variants   | n.a.              | natural origin           |               |
|                                           |                | <i>er1-3</i>             | G288 → stop                  | TM4               | natural origin           |               |
|                                           |                | <i>er1-4</i>             | ΔA91 (in frame shift)        | miss 1EXTRA & TM1 | natural origin           | [2]           |
|                                           |                | <i>er1-5</i>             | W190 → stop                  | 2IC               | DES                      |               |
|                                           |                | <i>er1-6</i>             | L353P                        | TM6               | natural origin           | [3]           |
|                                           |                | n.a.                     | Q226 → stop                  | 2IC               | ENU                      | [4]           |
|                                           |                | n.a.                     | 312Y → stop                  | TM5               | ENU                      |               |
| Petunia<br>( <i>Petunia x hybrida</i> )   | <i>PhMLO1</i>  | n.a.                     | S130L                        | TM3               | EMS/TILLING              | [5]           |
|                                           |                | n.a.                     | G176E                        | 2IC               | EMS/TILLING              |               |
| Rose<br>( <i>Rosa multiflora</i> )        | <i>RhMLO4</i>  | n.a.                     | V519 → stop                  | C-terminal        | natural origin           | [6]           |
|                                           |                | n.a.                     | T532 → stop                  | C-terminal        | natural origin           |               |
| Tomato<br>( <i>Solanum lycopersicum</i> ) | <i>SlMLO1</i>  | <i>m200</i>              | L22 → stop                   | TM1               | EMS                      | Present study |
|                                           |                | <i>ol-2</i>              | Q198 → stop                  | 2IC               | natural origin           |               |
|                                           |                | <i>Slmlo1.1</i>          | M403 → stop                  | 3EXTRA            | natural origin           |               |
|                                           |                | n.a.                     | Small deletion               | TM7               | CRISPR-Cas9              |               |
| Apple<br>( <i>Malus domestica</i> )       | <i>MdMLO19</i> | n.a.                     | E405 → stop                  | 3EXTRA            | natural origin           | [10]          |
| Grapevine<br>( <i>Vitis vinifera</i> )    | <i>VvMLO3</i>  | n.a.                     | INDEL                        | 3EXTRA            | CRISPR-Cas9              | [11]          |
| Cucumber<br>( <i>Cucumis sativus</i> )    | <i>CsaMLO1</i> | n.a.                     | V170G                        | TM3               | natural origin           | [12]          |
|                                           |                |                          | V472I                        | C-terminal        | natural origin           |               |
|                                           |                |                          | V557I                        | C-terminal        | natural origin           |               |
|                                           | <i>CsaMLO8</i> | n.a.                     | K178 → stop                  | 2IC               | natural origin           | [13]          |
|                                           |                |                          | K487 → stop                  | C-terminal        | natural origin           |               |
| Tobacco<br>( <i>Nicotiana tabacum</i> )   | <i>NtMLO1</i>  | n.a.                     | Q198R                        | 2IC               | PCR error during cloning | [15]          |
|                                           |                |                          | 6 aberrant splicing variants | 2IC               | natural origin           | [16]          |
|                                           |                |                          | 2 aberrant splicing variants | 2IC               | natural origin           |               |
| <i>Arabidopsis thaliana</i>               | <i>AtMLO2</i>  | <i>Atmlo2-8 (pmr2-2)</i> | G66R                         | TM2               | EMS                      | [17]          |
| Barley<br>( <i>Hordeum vulgare</i> )      | <i>HvMLO</i>   | n.a.                     | V76L                         | TM2               | natural origin           | [18]          |
|                                           |                | <i>mlo-12</i>            | F240L                        | 2IC               | NMU                      |               |
|                                           |                | <i>mlo-28</i>            | T222I                        | 2IC               | NaN3                     |               |
|                                           |                | <i>mlo-1</i>             | W162R                        | 2IC               | X-rays                   |               |
|                                           |                | <i>mlo-6</i>             | 3 aberrant splicing variants | n.a.              | EMS                      |               |
|                                           |                | <i>mlo-44</i>            | 1 aberrant splicing variant  | n.a.              | NaN3                     |               |
|                                           |                | <i>mlo-16</i>            | 1 aberrant splicing variant  | n.a.              | EMS                      |               |
|                                           |                | <i>mlo-30</i>            | 2 aberrant splicing variants | C terminal        | EMS                      |               |
|                                           |                | <i>mlo-11</i>            | aberrant splicing variants   | n.a.              | natural origin           |               |
|                                           |                | <i>mlo-2</i>             | A349T                        | TM6               | X-rays                   |               |
|                                           |                | <i>mlo-34</i>            | W423 → stop                  | C-terminal, CaMBD | EHOES                    |               |
|                                           |                | <i>mlo-36</i>            | W357 → stop                  | TM6               | iso-PMS                  |               |
|                                           |                | <i>mlo-39</i>            | Q351 → stop                  | TM6               | iso-PMS                  |               |
|                                           |                | <i>mlo-43</i>            | Q210 → stop                  | 2IC               | NaN3                     |               |
|                                           |                | <i>mlo-32</i>            | E35 → stop                   | TM1               | NaN3                     |               |
|                                           |                | <i>mlo-31</i>            | G276 → stop                  | TM5               | NaN3                     |               |
|                                           |                | <i>mlo-35</i>            | H231L                        | 2IC               | iso-PMS                  |               |
|                                           |                | <i>mlo-37</i>            | S71F                         | 1EXTRA            | iso-PMS                  |               |
|                                           |                | <i>mlo-38</i>            | G318R                        | 3IC               | iso-PMS/NaN3             |               |
|                                           |                | <i>mlo-40</i>            | G264D                        | TM4               | NaN3                     |               |
|                                           |                | <i>mlo-41</i>            | R209K                        | 2IC               | NaN3                     |               |
|                                           |                | <i>mlo-42</i>            | S187L                        | 2IC               | X-rays                   |               |
|                                           |                | <i>mlo-5</i>             | M1I                          | N-terminus        | EMS                      |               |
|                                           |                | <i>mlo-8</i>             | M1V                          | N-terminus        | EMS                      |               |
|                                           |                | <i>mlo-7</i>             | G226D                        | 2IC               | EMS                      |               |
|                                           |                | <i>mlo-9</i>             | R10W                         | N-terminus        | EMS                      |               |
|                                           |                | <i>mlo-13</i>            | V30E                         | TM1               | EMS                      |               |

| Plant species                         | MLO gene        | Allele name         | Amino-acid exchange                    | Location | Origin         | Reference |
|---------------------------------------|-----------------|---------------------|----------------------------------------|----------|----------------|-----------|
| Barley<br>( <i>Hordeum vulgare</i> )  | <i>HvMLO</i>    | <i>mlo-17</i>       | S31F                                   | TM1      | EMS            | [18]      |
|                                       |                 | <i>mlo-26</i>       | L270H                                  | TM4      | EMS            |           |
|                                       |                 | <i>mlo-27</i>       | G318E                                  | 3IC      | EMS            |           |
|                                       |                 | <i>mlo-29</i>       | P334L                                  | 3IC      | NaN3           |           |
|                                       |                 | <i>mlo-33</i>       | A306T                                  | 3IC      | NaN3           |           |
|                                       |                 | <i>mlo-3</i>        | frame shift P396                       | TM7      | gamma-rays     |           |
|                                       |                 | <i>mlo-4</i>        | frame shift W159                       | 2IC      | X-rays         |           |
|                                       |                 | <i>mlo-10</i>       | deletion F182 and T183                 | 2IC      | gamma-rays     |           |
|                                       |                 | n.a.                | W159R                                  | 2IC      | SDM            |           |
|                                       |                 | n.a.                | W162A or W163E                         | 2IC      | SDM            |           |
|                                       |                 | n.a.                | E163R                                  | 2IC      | SDM            |           |
|                                       |                 | n.a.                | S187F                                  | 2IC      | SDM            |           |
|                                       |                 | n.a.                | D219                                   | 2IC      | SDM            |           |
|                                       |                 | n.a.                | D251N                                  | TM4      | SDM            |           |
|                                       |                 | n.a.                | L307A                                  | 3IC      | SDM            |           |
|                                       |                 | n.a.                | P320A                                  | 3IC      | SDM            |           |
|                                       |                 | n.a.                | P324A                                  | 3IC      | SDM            |           |
|                                       |                 | n.a.                | F329A                                  | 3IC      | SDM            |           |
|                                       |                 | n.a.                | W330A                                  | 3IC      | SDM            |           |
|                                       |                 | n.a.                | F331A                                  | 3IC      | SDM            |           |
|                                       |                 | n.a.                | R333A                                  | 3IC      | SDM            |           |
|                                       |                 | n.a.                | C367A                                  | 3EXTRA   | SDM            |           |
|                                       |                 | n.a.                | C98A                                   | 1EXTRA   | SDM            |           |
|                                       |                 | n.a.                | C86A                                   | 1EXTRA   | SDM            |           |
|                                       |                 | n.a.                | C114A                                  | 1EXTRA   | SDM            |           |
|                                       |                 | n.a.                | P395G                                  | TM7      | SDM            |           |
|                                       |                 | <i>mlo-11(cnv2)</i> | aberrant splicing variants             | n.a.     | natural origin | [19]      |
| Wheat<br>( <i>Triticum aestivum</i> ) | <i>TaMLO-A1</i> |                     | P325L                                  | 3IC      | EMS/TILLING    | [20]      |
|                                       | <i>TaMLO-A1</i> |                     | A354V                                  | TM6      | EMS/TILLING    |           |
|                                       | <i>TaMLO-B1</i> |                     | G296E                                  | TM5      | EMS/TILLING    |           |
|                                       | <i>TaMLO-B1</i> |                     | T297I                                  | 3IC      | EMS/TILLING    |           |
|                                       | <i>TaMLO-B1</i> |                     | R313W                                  | 3IC      | EMS/TILLING    |           |
|                                       | <i>TaMLO-B1</i> |                     | S315N                                  | 3IC      | EMS/TILLING    |           |
|                                       | <i>TaMLO-B1</i> |                     | G319R                                  | 3IC      | EMS/TILLING    |           |
|                                       | <i>TaMLO-B1</i> |                     | A320T                                  | 3IC      | EMS/TILLING    |           |
|                                       | <i>TaMLO-B1</i> |                     | T345M                                  | TM6      | EMS/TILLING    |           |
|                                       | <i>TaMLO-D1</i> |                     | V316T                                  | 3IC      | EMS/TILLING    |           |
|                                       | <i>TaMLO-D1</i> |                     | G319R                                  | 3IC      | EMS/TILLING    |           |
|                                       | <i>TaMLO-D1</i> |                     | A320T                                  | 3IC      | EMS/TILLING    |           |
|                                       | <i>TaMLO-D1</i> |                     | P321S                                  | 3IC      | EMS/TILLING    |           |
|                                       | <i>TaMLO-D1</i> |                     | V323I                                  | 3IC      | EMS/TILLING    |           |
|                                       | <i>TaMLO-D1</i> |                     | P335L                                  | 3IC      | EMS/TILLING    |           |
|                                       | <i>TaMLO-D1</i> |                     | T345M                                  | TM6      | EMS/TILLING    |           |
|                                       | <i>TaMLO-A1</i> |                     | aberrant splicing variants<br>and T78K | 2IC      | CRISPR-Cas9    | [21]      |

n.a., not available; TM: Transmembrane; IC: Intracellular; EXTRA: Extracellular; DES: diethyl sulfate; ENU: N-ethyl-N-nitrosourea; EMS: Ethyl methanesulfonate; NMU: N-Nitroso-N-methylurea; NaN3: sodium azide; SDM: site-directed mutagenesis; EHOES: Ethyl hydroxyethanesulfonate; iso-PMS: isopropyl-methane-sulfonate; INDEL: insertion and deletion.

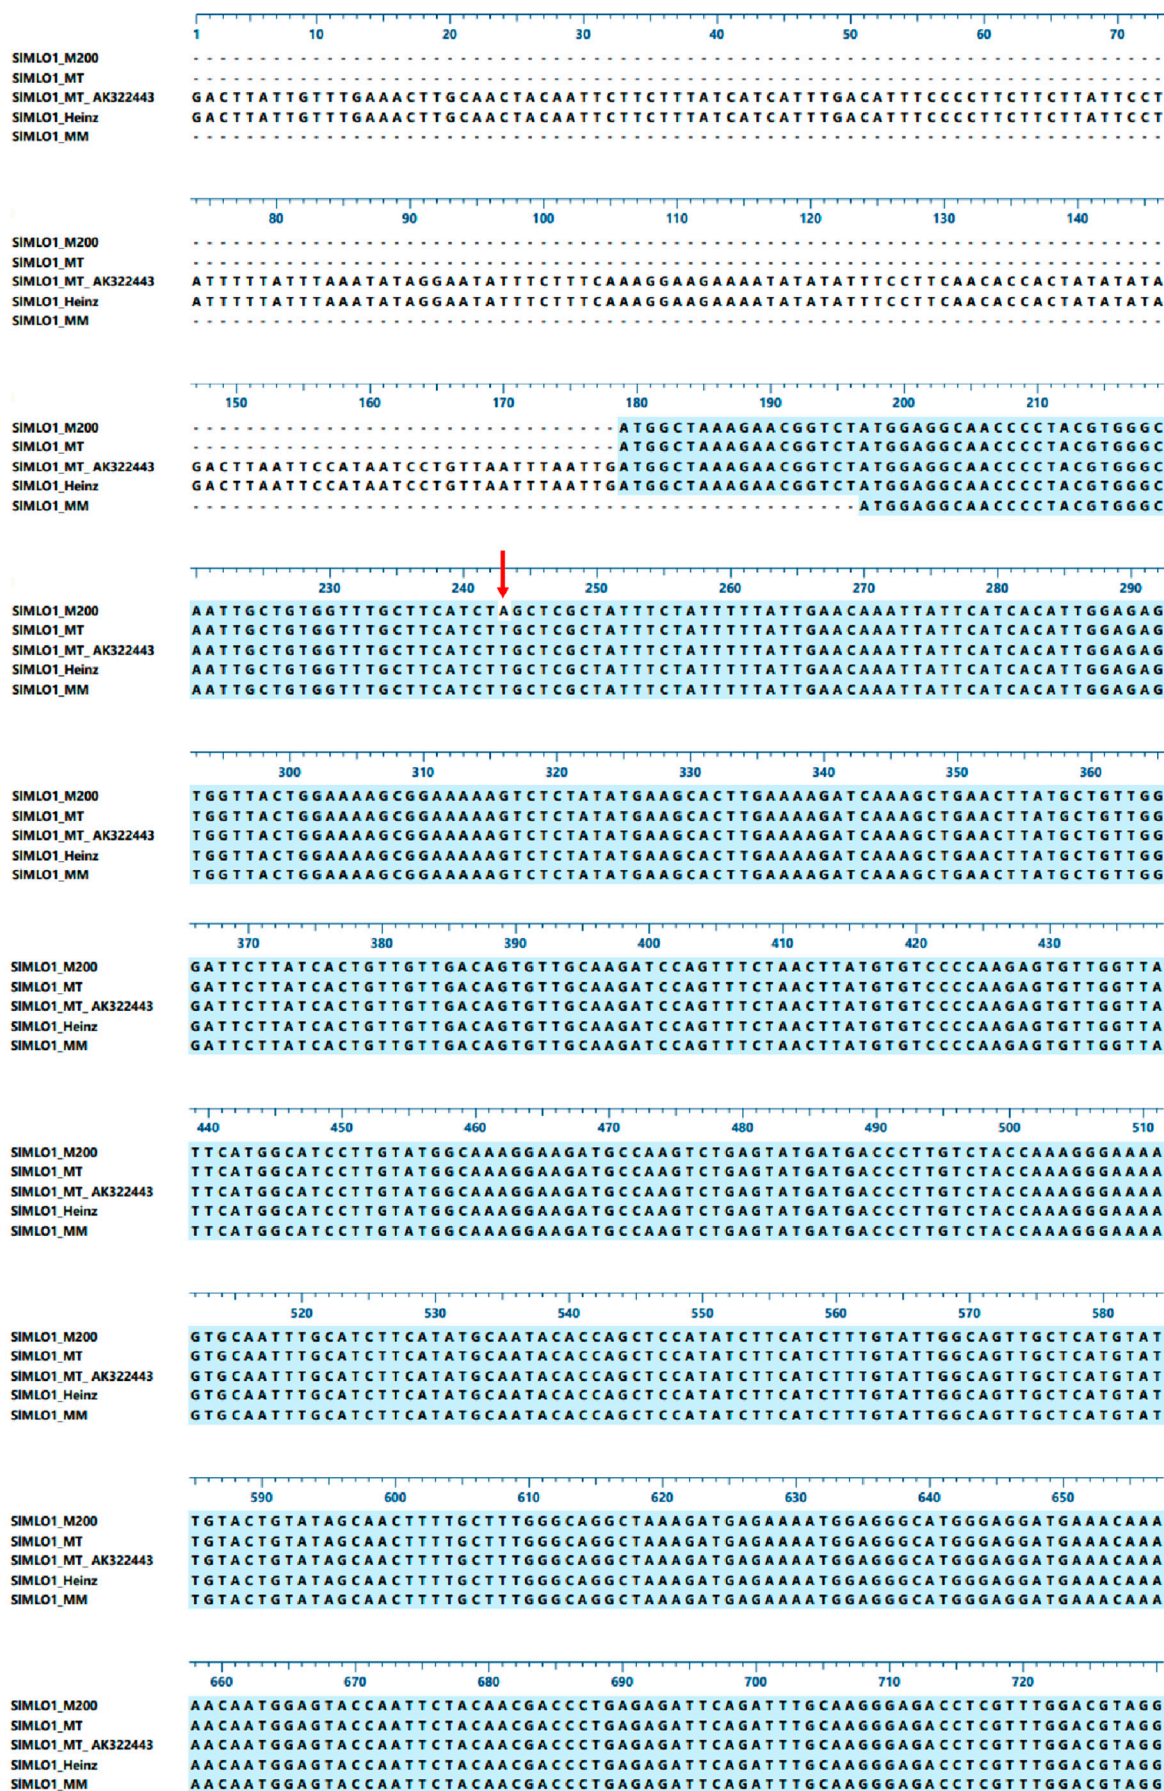



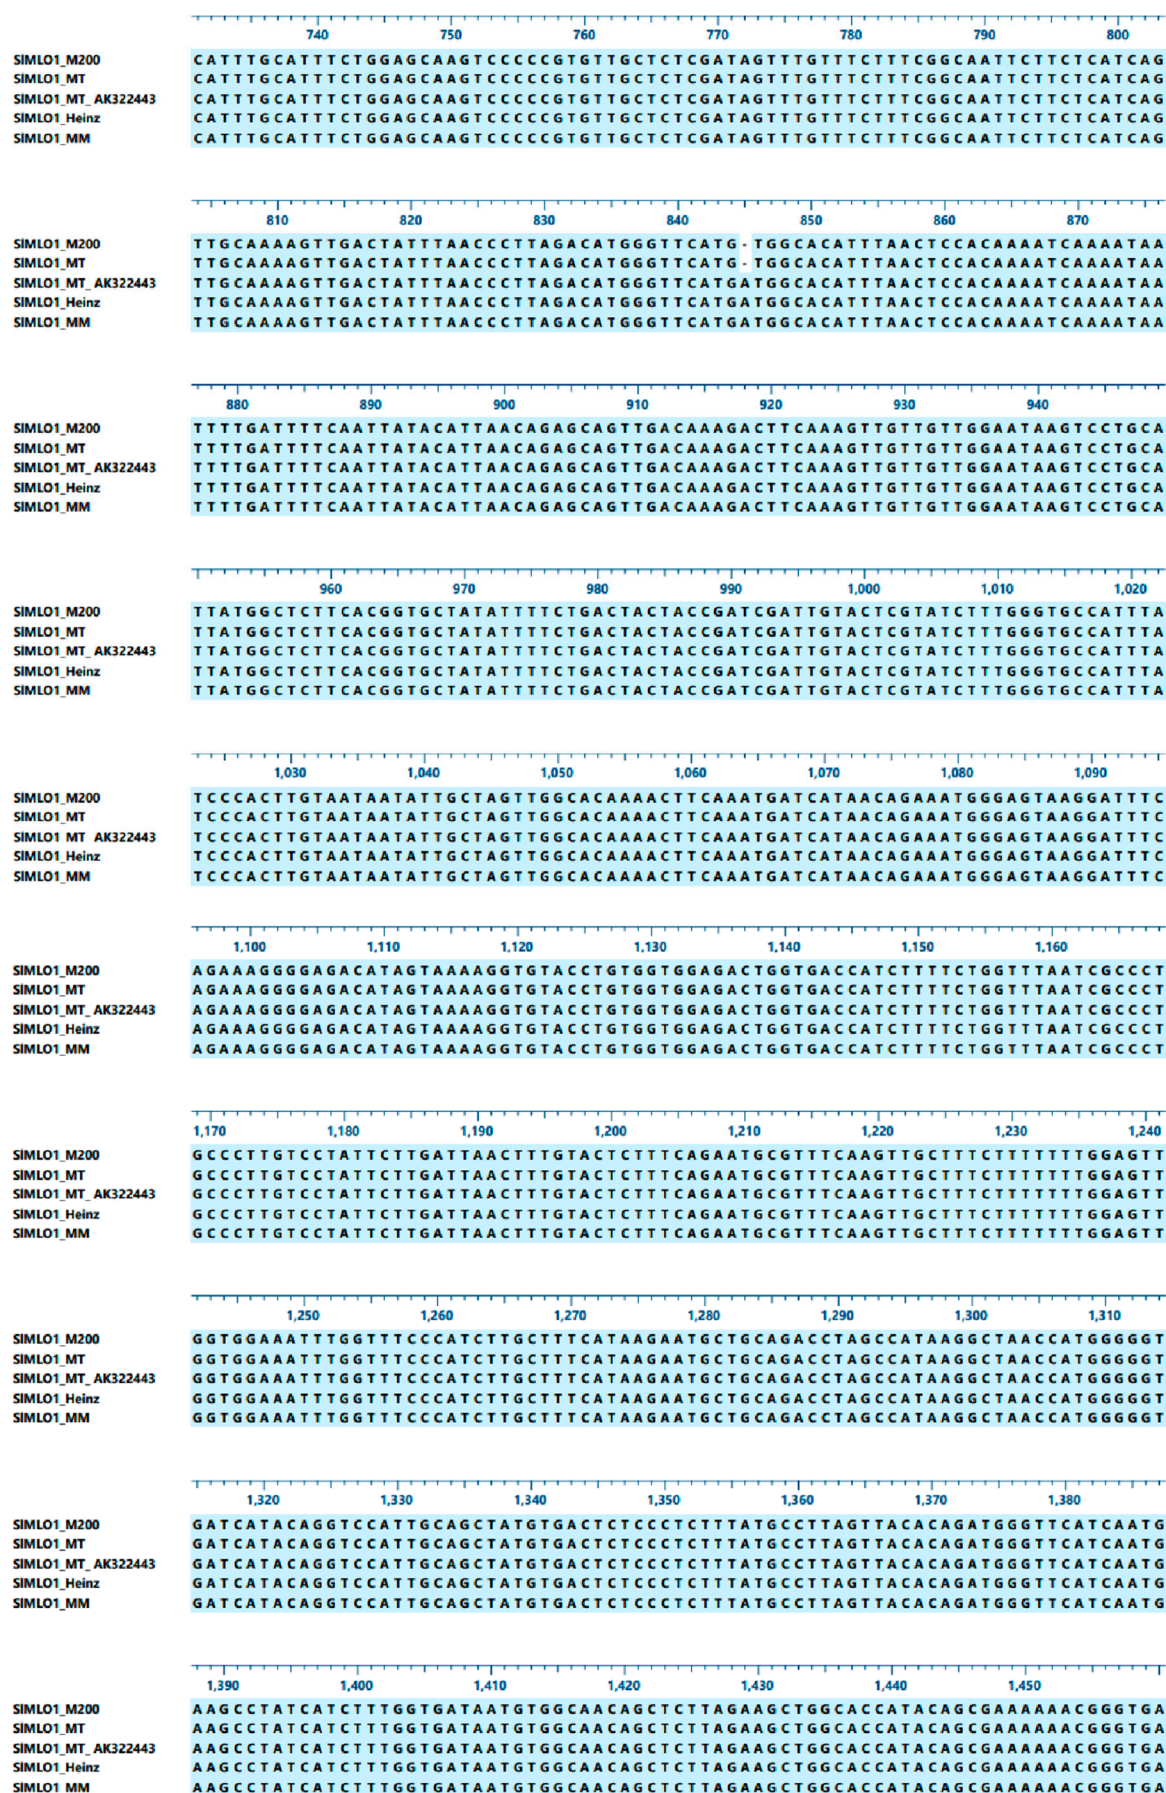

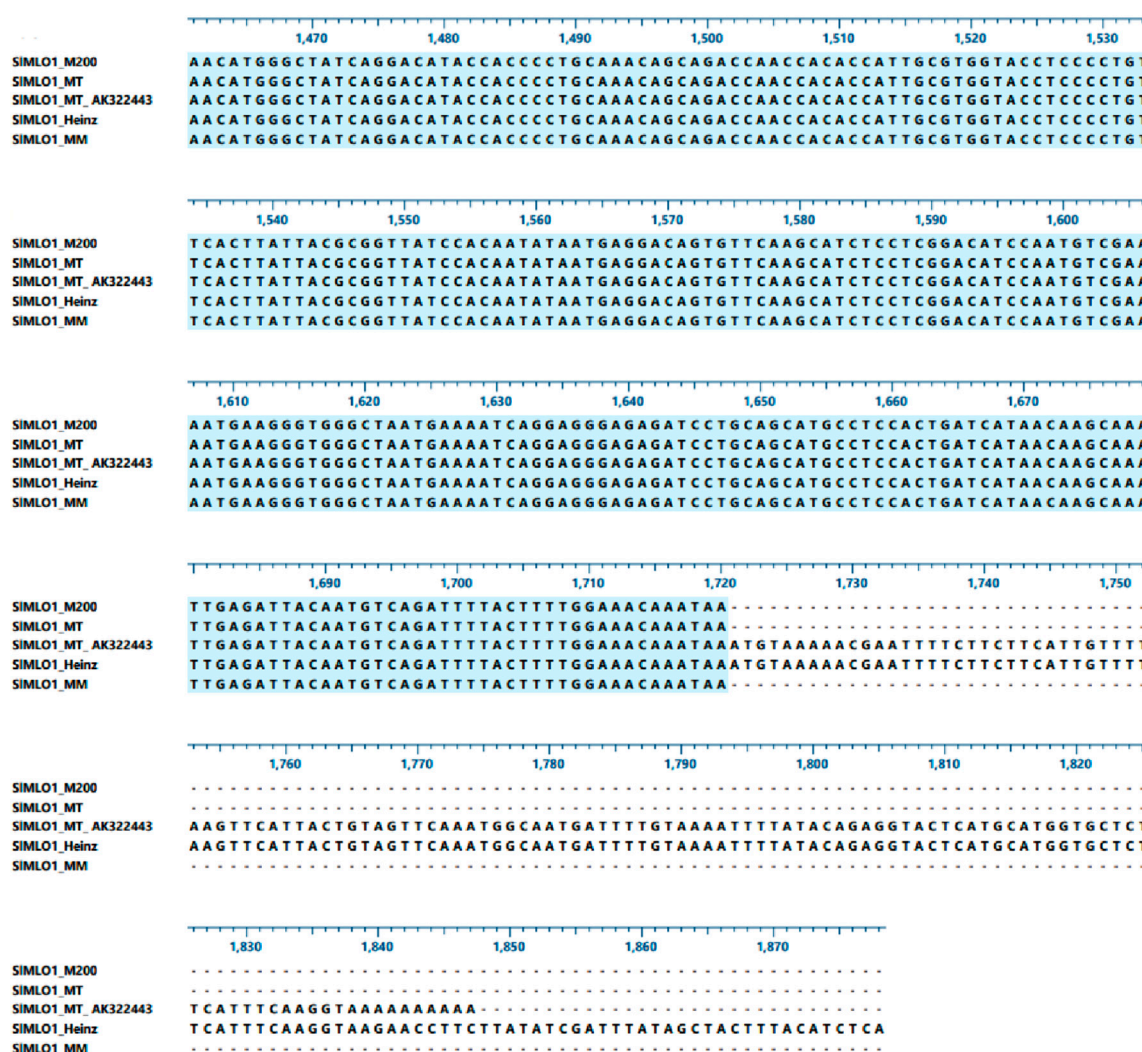

**Figure S1.** Nucleotide alignment of the *SIMLO1* sequence experimentally obtained from the tomato cv Micro-Tom (MT), the full-length transcript AK322443 of MT *SIMLO1* obtained from NCBI, the *SIMLO1* gene in M200, MM leaf cDNA sequence of *SIMLO1* obtained from Zheng et al. [22] and the one from the cv Heinz as in the SGN database Solyc04g49090.3). Arrow indicates the base change T → A responsible for the premature stop codon in M200 plants.



I II

AtMLO2 1 MA-DQV--KERTLEETSTWAVAVVCFVLLFISIVLEHSIHKIGTWFKKKKQALFEALEKVAEIMMLGFLSLLLTIGQT  
 AtMLO6 1 MA-DQV--KEKLEETSTWAVAVVCFVLLFISIVLEKLIHKIGSWFKKKKKALYEALEKVAEIMMLGFLSLLLTIGQG  
 AtMLO12 1 MA---I---KERSLEETPTWAVAVVCFVLLFISIMIEYFLHFIGHWFKKKKKKALSEALEKVAEIMMLGFLSLLLVLTQ  
 PsMLO1 1 MAEEGV--KERTLEETPTWAVAVVCFVLLFISIVLEHIIHVGKWLKKRKNALYEALEKVAEIMMLGFLSLLLTIVFQD  
 MtMLO1 1 MAEDKV--YERTLEETPTWAVAVVCFVLLFISIVLEHIIHAIGKWFKKKKNALYEALEKVAEIMMLGFLSLLLTIVFQD  
 LjMLO1 1 M--DKV--AQKLEETPTWAVAVVCFVLLFISIVLEHIIHGIEAIEKWLEKRRKKALHEAVEKVAEIMMLGFLSLLLTIVFKD  
 CaMLO2 1 MA-----KERSMEATPTWAVAVVCFVLLFISIXIPIQHHLGEWLLKKKKKPLYEALEKVAEIMMLGFLSLLLTIVQD  
 SlMLO1 1 MA-----KERSMEATPTWAVAVVCFVLLFISIFIEQIIHHLGEWLLKKKKKSLYEALEKVAEIMMLGFLSLLLTIVLQD  
 NtMLO1 1 MA-----KERSMEATPTWAVAVVCFVLLFISIFIEQIIHHLGEWLLKKKKKPLYEALEKVAEIMMLGFLSLLLTIVVQS  
 SmMLO1 1 MA-----KERSMEATPTWAVAVVCFVLLFISIFIEQIIHHLGEWLLKKKKKPLHEALEKVAEIMMLGFLSLLLTIVVQD  
 CsaMLO8 1 MAE---CGTEQRTLEETSTWAVAVVCFVLLFISIFIEHVIHLTGKWLEKRRKPPALVEALEKVAEIMMLGFLSLLLTIGQD  
 CsaMLO1 1 MAG---AAGGKSEETPTWAVAVVCFVLLFISIFIEYSLHLIGHWLLKKRRKALFEALEKVAEIMMLGFLSLLLTIVGQG  
 MdMLO19 1 MAGGK---KGRSLEETPTWAVAVVCFVLLFISIVLEHIIHIGKWLKKRKNALYEALEKVAEIMMLGFLSLLLTIVGQG  
 TaMLO\_B1a 1 MADDEYPPARTLPETESWAVAVVCFVLLFISIVLEHIIHHLGHWFHKKRKNALAEALEKVAEIMMLGFLSLLLTAVTQD  
 TaMLO\_A1b 1 MAKDDGYPPARTLPETESWAVAVVCFVLLFISIVLEHIIHHLGHWFHKKRKNALAEALEKVAEIMMLGFLSLLLTAVTQD  
 TaMLO1-D1 1 MAEDYEPARTLPETESWAVAVVCFVLLFISIVLEHIIHHLGHWFHKKRKNALAEALEKVAEIMMLGFLSLLLTAVTQD  
 HvMLO 1 MSDKKGVPAELPETESWAVAVVCFVLLFISIVLEHIIHHLGHWFHKKRKNALAEALEKVAEIMMLGFLSLLLTIVTQD  
 OsMLO2 1 MAGGGGGR-A--LPETPTWAVAVVCFVLLFISIVLEHIIHHLGHWFHKKRKNALAEALEKVAEIMMLGFLSLLLTVAQT

AtMLO2 78 PI-SNICISQKVASTMHPCSAAEEAKKYGKKDAGKKDDGDGDKPGRRLLELAES---YIHRSLATKGYDKCAEKGK--  
 AtMLO6 78 YI-SNICIPKNIAASMHPCSAEEAKKYGKKDVPKDE---EENLRKLLQLVDS---LIPRSLATKGYDKCAEKGK--  
 AtMLO12 76 PV-SEICIPRNIAATWHPCSNHQEIAGKDKYI---DDG-----RKILEDDFSNDYSPRRNLATKGYDKCAEKGK--  
 PsMLO1 79 NI-SKICVSQKIGSTWHPGSTSNT-----KAKAKSDESLDYKTNDRKLLLEYFDP---IPRILATKGYDKCFDKGQ--  
 MtMLO1 79 YI-SKICISEKVGSTWHPGSTPKT-----KT-ASNDENSESE-NHDKLLLEYFDP---NPRILATKGYDQCADGK--  
 LjMLO1 77 PI-SNICISQKVASTWHPCHPEEK-----K---KGPEGY-----YDKCAKDGKDK  
 CaMLO2 75 PV-SNICVPKSVGYSWHPCKADEVDK-----K---KGPEGY-----SEYDDPCLQKGGK--  
 SlMLO1 69 PV-SNICVPKSVGYSWHPCKMAKEDAK-----K---KGPEGY-----SEYDDPCLPKGK--  
 NtMLO1 69 PV-SNICVPKSVGYSWHPCKSDEAK-----K---KGPEGY-----NKYDDPCLPKGK--  
 SmMLO1 75 PV-SNICVPKTVGYSWHPCKAQEDDKP-----K---KGPEGY-----KYDDPCLPKGK--  
 CsaMLO8 79 AV-TQICVSKELAATWLPCKAARAKT-----GVKVAKNSRLRLLEFLDPDYG--RRILASKGDDACAKRGK--  
 CsaMLO1 78 PI-TEICIPQHVAAATWHPCKTEREDEN-----KEVEKSEVHLGNRRRLHLLNGESFRRLSAAAGGEDKCAAKG--  
 MdMLO19 78 PI-SNICISKAVGATWHPCKSKQEV-----KSDKNEKSSVSDNARRRLSALDSSGGG--RRVLAAAGYDKCAAKNK--  
 TaMLO\_B1a 81 PI-SGICISEKAASIMRCKL-PP-----GSVKSKYKDY-----YCAQKGGK--  
 TaMLO\_A1b 81 PI-SGICISEKAASIMRCKV-EP-----GSVKSKYKDY-----YCAKEGK--  
 TaMLO1-D1 81 PI-SGICISEKAASIMRCKSLPPGSVK-----SKYKD-Y--Y-----CAKKGK--  
 HvMLO 80 PIIAKICISEDADVMWPKRGTE-----GRKPKSYVDY-----CP-EGK--  
 OsMLO2 78 PI-SKICIPESAANIMLPCKAGQDIVKGLG-----KKDHRRLWYTGEESHRRSLAGAAGEDYCAQSGK--

III

AtMLO2 152 VAFVAYGIHQHIFIFVLAHVHVIYCIYAFGKIKMRTWKSNEETKTIEYQYNDPERFRFARDTSGRRHLNFWSK  
 AtMLO6 149 VAFVAYGMHQHIFIFVLAHVHVIYCIYAFGKTKMRRWKSNEETKTIEYQYNDPERFRFARDTSGRRHLSFWSK  
 AtMLO12 143 VALVAYGIHQHIFIFVLAHVHVIYCIYAFGKTKMRRWKSNEETKTIEYQYNDPERFRFARDTSGRRHLNFWSK  
 PsMLO1 147 VALVAYGIHQHIFIFVLAHVHVIYCIYAFGKTKMRRWKSNEETKTIEYQYNDPERFRFARDTSGRRHLSFWSK  
 MtMLO1 145 VALVAYGIHQHIFIFVLAHVHVIYCIYAFGKTKMRRWKSNEETKTIEYQYNDPERFRFARDTSGRRHLSFWSK  
 LjMLO1 118 VAFVAYGIHQHIFIFVLAHVHVIYCIYAFGKTKMRRWKSNEETKTIEYQYNDPERFRFARDTSGRRHLNFWSK  
 CaMLO2 112 VQFASVYAIHQHIFIFVLAHVHVIYCIYAFGKTKMRRWKSNEETKTIEYQYNDPERFRFARDTSGRRHLSFWSK  
 SlMLO1 106 VQFASVYAIHQHIFIFVLAHVHVIYCIYAFGKTKMRRWKSNEETKTIEYQYNDPERFRFARDTSGRRHLSFWSK  
 NtMLO1 106 VQFASVYAIHQHIFIFVLAHVHVIYCIYAFGKTKMRRWKSNEETKTIEYQYNDPERFRFARDTSGRRHLSFWSK  
 SmMLO1 112 VQFASVYAIHQHIFIFVLAHVHVIYCIYAFGKTKMRRWKSNEETKTIEYQYNDPERFRFARDTSGRRHLSFWSK  
 CsaMLO8 142 VAFVAYGIHQHIFIFVLAHVHVIYCIYAFGKTKMRRWKSNEETKTIEYQYNDPERFRFARDTSGRRHLSFWSK  
 CsaMLO1 150 ASFIADGIHQHIFIFVLAHVHVIYCIYAFGKTKMRRWKSNEETKTIEYQYNDPERFRFARDTSGRRHLSFWSK  
 MdMLO19 149 VPFVYGIHQHIFIFVLAHVHVIYCIYAFGKTKMRRWKSNEETKTIEYQYNDPERFRFARDTSGRRHLSFWSK  
 TaMLO\_B1a 120 VSLMSTGSLHQHIFIFVLAHVHVIYCIYAFGKTKMRRWKSNEETKTIEYQYNDPERFRFARDTSGRRHLSFWSK  
 TaMLO\_A1b 120 VSLMSTGSLHQHIFIFVLAHVHVIYCIYAFGKTKMRRWKSNEETKTIEYQYNDPERFRFARDTSGRRHLSFWSK  
 TaMLO1-D1 120 VSLMSTGSLHQHIFIFVLAHVHVIYCIYAFGKTKMRRWKSNEETKTIEYQYNDPERFRFARDTSGRRHLSFWSK  
 HvMLO 119 VALMSTGSLHQHIFIFVLAHVHVIYCIYAFGKTKMRRWKSNEETKTIEYQYNDPERFRFARDTSGRRHLSFWSK  
 OsMLO2 144 VALMSTGSGMHQHIFIFVLAHVHVIYCIYAFGKTKMRRWKSNEETKTIEYQYNDPERFRFARDTSGRRHLSFWSK

IV

AtMLO2 232 TRVTWLVCFRQFEGSVTKVDYTLRHGFIAHAPGNSRDFRKYIQRSLEKDFKTVVEISPVVFAVFLFLLTNSY  
 AtMLO6 229 STITWLVCFRQFEGSVTKVDYTLRHGFIAHAPGNSRDFRKYIQRSLEKDFKTVVEISPVVFAVFLFLLTNSY  
 AtMLO12 223 STFTWLVCFRQFEGSVTKVDYTLRHGFIAHAPGNSRDFRKYIQRSLEKDFKTVVEISPVVFAVFLFLLTNSY  
 PsMLO1 227 SPILLWLVCFRQFEGSVTKVDYTLRHGFIAHAPGNSRDFRKYIQRSLEKDFKTVVEISPVVFAVFLFLLTNSY  
 MtMLO1 225 SPISLVWLVCFRQFEGSVTKVDYTLRHGFIAHAPGNSRDFRKYIQRSLEKDFKTVVEISPVVFAVFLFLLTNSY  
 LjMLO1 198 SPISLVWLVCFRQFEGSVTKVDYTLRHGFIAHAPGNSRDFRKYIQRSLEKDFKTVVEISPVVFAVFLFLLTNSY  
 CaMLO2 192 SPVLMWLVCFRQFEGSVTKVDYTLRHGFIAHAPGNSRDFRKYIQRSLEKDFKTVVEISPVVFAVFLFLLTNSY  
 SlMLO1 186 SPVLLWLVCFRQFEGSVTKVDYTLRHGFIAHAPGNSRDFRKYIQRSLEKDFKTVVEISPVVFAVFLFLLTNSY  
 NtMLO1 186 SPVLLWLVCFRQFEGSVTKVDYTLRHGFIAHAPGNSRDFRKYIQRSLEKDFKTVVEISPVVFAVFLFLLTNSY  
 SmMLO1 192 SPILLWLVCFRQFEGSVTKVDYTLRHGFIAHAPGNSRDFRKYIQRSLEKDFKTVVEISPVVFAVFLFLLTNSY  
 CsaMLO8 222 TPISLVWLVCFRQFEGSVTKVDYTLRHGFIAHAPGNSRDFRKYIQRSLEKDFKTVVEISPVVFAVFLFLLTNSY  
 CsaMLO1 230 NPALWLVCFRQFEGSVTKVDYTLRHGFIAHAPGNSRDFRKYIQRSLEKDFKTVVEISPVVFAVFLFLLTNSY  
 MdMLO19 229 SPISLVWLVCFRQFEGSVTKVDYTLRHGFIAHAPGNSRDFRKYIQRSLEKDFKTVVEISPVVFAVFLFLLTNSY  
 TaMLO\_B1a 199 TPGVRWVAVFRQFEGSVTKVDYTLRHGFIAHAPGNSRDFRKYIQRSLEKDFKTVVEISPVVFAVFLFLLTNSY  
 TaMLO\_A1b 199 TPGVRWVAVFRQFEGSVTKVDYTLRHGFIAHAPGNSRDFRKYIQRSLEKDFKTVVEISPVVFAVFLFLLTNSY  
 TaMLO1-D1 199 TPGVRWVAVFRQFEGSVTKVDYTLRHGFIAHAPGNSRDFRKYIQRSLEKDFKTVVEISPVVFAVFLFLLTNSY  
 HvMLO 198 TPGVRWVAVFRQFEGSVTKVDYTLRHGFIAHAPGNSRDFRKYIQRSLEKDFKTVVEISPVVFAVFLFLLTNSY  
 OsMLO2 223 TPGVRWVAVFRQFEGSVTKVDYTLRHGFIAHAPGNSRDFRKYIQRSLEKDFKTVVEISPVVFAVFLFLLTNSY



**V**

|           |     |                                                                                                         |
|-----------|-----|---------------------------------------------------------------------------------------------------------|
| AtMLO2    | 312 | GLRSYLWLPFIPLVVILVGTKEVITITKGLRIQEKGDVVVGAPVVVPGDDLFWFGKPRFIFLIHLVLFTNAFQLA                             |
| AtMLO6    | 309 | GLNSYLWLPFIPFIVILVGTKEVITITKGLRIQEKGDVVVGAPVVVPGDHFFWFGKPRFIFLIHLVLFTNAFQLA                             |
| AtMLO12   | 303 | GWDSYLWLPFIPFIVILVGTKEVITITKGLRIQEKGDVVVGAPVVVPGDDLFWFGKPRFIFLIHLVLFTNAFQLA                             |
| PsMLO1    | 307 | GWYSY <del>Y</del> WLPFIPLVVILVGTKEVITITKGLRIQDRGEVIKGA <del>P</del> VPVEPGDHLFWENRPHLLFTIHLVLFTNAFQLA  |
| MtMLO1    | 305 | GWYSYLWLPFIPFIVILVGTKEVITITKGLRIQDRGEVIKGA <del>P</del> VPVEPGDHLFWENRPHLLFTIHLVLFTNAFQLA               |
| LjMLO1    | 278 | GWHSYLWLPFIPFIVILVGTKEVITITMGLKIQERGDVIKGA <del>P</del> VPVEPGDDLFWENRPHLLFTIHLVLFTNAFQLA               |
| CaMLO2    | 272 | GVYSYLWVPFVPLIIILLVGTKEVITITMGLKIQERGDVIKGA <del>P</del> VPVEIGDHLFWENRPHLLFTIHLVLFTNAFQLA              |
| SlMLO1    | 266 | RLYSYLWVPFIPFIVILVGTKEVITITMGLKIQERGDVIKGA <del>P</del> VPVEIGDHLFWENRPHLLFTIHLVLFTNAFQLA               |
| NtMLO1    | 266 | GLYSYLWVPFIPFIVILVGTKEVITITMGLKIQERGDVIKGA <del>P</del> VPVEIGDHLFWENRPHLLFTIHLVLFTNAFQLA               |
| SmMLO1    | 272 | GLYSYLWVPFVPLIIILLVGTKEVITITMGLKIQERGDVIKGA <del>P</del> VPVEIGDHLFWENRPHLLFTIHLVLFTNAFQLA              |
| CsaMLO8   | 302 | GWYSYLWLPFISLIIILLVGTKEVITITMGLTQIERGHVVGKVPVPRDDLFWFGKPRFIFLIHLVLFTNAFQLA                              |
| CsaMLO1   | 310 | GWRAYLWLPFIPFIVILVGTKEVITITKMLRIQERGEVVGKVPVVEPGDDLFWENRPHLLFTIHLVLFTNAFQLA                             |
| MdMLO19   | 309 | GSRSYLWLPFVPLVMIIMVGTKEVITITKMLKLSERGEVVRGTPVPEPGDHLFWENRPHLLFTIHLVLFTNAFQLA                            |
| TaMLO_B1a | 277 | GIGTLTWISFIPFIVILVGTKEVITITMGLKIQERGDVIKGA <del>P</del> VPVEPSNKF <del>FW</del> HRPDWVFFIHLTLFTNAFQMAH  |
| TaMLO_A1b | 277 | GIGTLTWISFIPFIVILVGTKEVITITMGLKIQERGDVIKGA <del>P</del> VPVEPSNKF <del>FW</del> HRPDWVFFIHLTLFTNAFQMAH  |
| TaMLO_D1  | 277 | GIGTLTWISFIPFIVILVGTKEVITITMGLKIQERGDVIKGA <del>P</del> VPVEPSNKF <del>FW</del> HRPDWVFFIHLTLFTNAFQMAH  |
| HvMLO     | 276 | GVGTLTWISFIPFIVILVGTKEVITITMGLKIQERGDVIKGA <del>P</del> VPVEPSNKF <del>FW</del> HRPDWVFFIHLTLFTNAFQMAH  |
| OsMLO2    | 301 | GFGTLTWISFVPLVILVGTKEVITITMGLKIQERDRAVVIKGA <del>P</del> VPVEPSNKF <del>FW</del> HRPDWVFFIHLTLFTNAFQMAH |

**VII**

|           |     |                                                                               |
|-----------|-----|-------------------------------------------------------------------------------|
| AtMLO2    | 392 | ANST-----YE--FNLNCFHESSTADVIRLVGAVVQILCSYVTLPLIALVTQMGSKMKPTVFENDRVATALKW     |
| AtMLO6    | 389 | VNST-----YE--FGLKNCFHESSTADVIRISIGLVQILCSYVTLPLIALVTQMGSKMKPTVFENDRVATALKSW   |
| AtMLO12   | 383 | VNST-----YE--FTLNCFHKTEDIAIRITMGVLIQVLCSYITPLIALVTQMGSTMRPTIFENDRVATALKW      |
| PsMLO1    | 387 | ANST-----YE--FSITSCFHKTETADSVIRITVGVIQTLCSYVTLPLIALVTQMGSTMRPTIFENDRVATALKW   |
| MtMLO1    | 385 | SNST-----YE--FSINSCFHRTADVIRISVIGILQVLCSYVTLPLIALVTQMGSTMRPTIFENDRVATALKW     |
| LjMLO1    | 358 | ANSA-----CDNDFKINSCFHSTADVIRITLGVTVQVLCSYVTLPLIALVTQMGSTMRPTIFENDRVATALKW     |
| CaMLO2    | 352 | VNSW-----WK--FGFPSCFHNAADLAIRITMGVLIQVLCSYVTLPLIALVTQMGSKMKPTIFGDNVATALRSW    |
| SlMLO1    | 346 | FSW-----WK--FGFPSCFHNAADLAIRITMGVLIQVLCSYVTLPLIALVTQMGSKMKPTIFGDNVATALRSW     |
| NtMLO1    | 346 | VNSW-----WK--FSYPSCFHQAADLAIRITMGVLIQVLCSYVTLPLIALVTQMGSTMRPTIFGDNVATALRSW    |
| SmMLO1    | 352 | VNSW-----WK--FDFPSCFHNAADLAIRITMGVLIQVLCSYVTLPLIALVTQMGSKMKPTIFGDNVATALRSW    |
| CsaMLO8   | 324 | ANTTYA-----FKWMGCFHQVEDIVIRLSMGVLIQVLCSYVTLPLIALVTQMGSKMKPTIFENDRVATALKW      |
| CsaMLO1   | 390 | ANTWY-----EFGLNCFHEHIEDVIRISMGVLIQVLCSYVTLPLIALVTQMGSKMKPTIFENDRVATALKW       |
| MdMLO19   | 389 | ANTWSGKGLHFTLLQYFGLKSCFHEKLEDVIRISMGVLIQVLCSYVTLPLIALVTQMGSTMRPTIFENDRVATALKW |
| TaMLO_B1a | 357 | VNTV-----AT--PGLKKCFHMHIGLSIMKVVGLALQFLCSYITFPLIALVTQMGSKMKPTIFDEQTKALTNW     |
| TaMLO_A1b | 357 | VNTV-----AT--PGLKKCFHMHIGLSIMKVVGLALQFLCSYITFPLIALVTQMGSKMKPTIFDEQTKALTNW     |
| TaMLO_D1  | 357 | VNTV-----AT--PGLKKCFHMHIGLSIMKVVGLALQFLCSYITFPLIALVTQMGSKMKPTIFDEQTKALTNW     |
| HvMLO     | 356 | VNTV-----AT--PGLKKCYHTQIGLSIMKVVGLALQFLCSYITFPLIALVTQMGSKMKPTIFDEQTKALTNW     |
| OsMLO2    | 381 | VNTL-----AT--PGLKKCFHENMGLSIMKVVVGIFIQFLCSYITFPLIALVTQMGSKMKPTIFDEQTKALTNW    |

### CaMBD

|           |     |                                                                                |
|-----------|-----|--------------------------------------------------------------------------------|
| AtMLO2    | 460 | HHTAKNETKHGRHSG-----S--NTPFSSRPPTPTHGSSPIHLLHNF--NNRSV-E--NYPSSPSPR---YSGHG--- |
| AtMLO6    | 457 | HHTAKNKHGRHSG-----S--TTPFSSRPPTPTHGSSPIHLLRNAPHKRSRSDVE--SFANSFSPR---NS-----   |
| AtMLO12   | 451 | HHTAKKQTKHG-HSG-----S--NTPHSSRPPTPTHGSSPVHLLHNY--NNRSLDQQTSTASPSPRPFSDYSGQG--- |
| PsMLO1    | 455 | HHTAKKQVKQSNHSN-----N--TTPYSSRPSTPTHGSSPVHLLHRH-TAGN-----SDSLQTSPE-----KS----  |
| MtMLO1    | 453 | HHTAKKQVKHKNHSN-----N--TTPYSSRPSTPTHGSSPVHLLHRQ-TFGN-----SDSLQTSPE-----TS----  |
| LjMLO1    | 428 | HHTAKKHVKHNRDSN-----SHSNTPFSSRPATPTHGSSPVHLLHKNHNYH-----SDSLASPR-----ESPS---   |
| CaMLO2    | 420 | HNTAKKRVRHGRVSE-----N--TTPISSRPATPLRGTSVHLLRGYPKY-N-----EDNQAYPRT-----S----    |
| SlMLO1    | 414 | HHTAKKRVKHG-LSG-----H--TTPANSRPPTPLRGTSVHLLRGYPQY-N-----EDSVQASPR-----S----    |
| NtMLO1    | 414 | HNTAKKRVKHGRVSE-----N--TTPVSSRPATPLHGTSPVHLLRGYPQY-N-----EES-----RT-----S----  |
| SmMLO1    | 420 | HHTAKKRVKHGRVSE-----N--TTPVSSRPPTPLHGTSPVHLLRGYPQY-N-----EDSVQASPR-----S----   |
| CsaMLO8   | 392 | HHSAKKNMKQHRNPD-----STSPFSSRPATPTHGSSPIHLLHNF--NNRSV-E--NYPSSPSPR---YSGHG---   |
| CsaMLO1   | 458 | YHSARKKHKNHGRS-----VTMSSRPATPTHGSSPVHLLHNY--NNRSLDQQTSTASPSPRPFSDYSGQG---      |
| MdMLO19   | 469 | HHTAKKRVKHGRVSE-----N--TTPVSSRPPTPLHGTSPVHLLRGYPQY-N-----EDSVQASPR-----S----   |
| TaMLO_B1a | 425 | RNTAKEKKKVRDMDLMAQMGIDATPSRGSPMPSPRGSSPVHLLHK-----GMGRSDDPQSSTPT-----          |
| TaMLO_A1b | 425 | RNTAKEKKKVRDMDLMAQMGIDATPSRGSPMPSPRGSSPVHLLHK-----GMGRSDDPQSSTPT-----          |
| TaMLO_D1  | 425 | RNTAKEKKKVRDMDLMAQMGIDATPSRGSPMPSPRGSSPVHLLHK-----GMGRSDDPQSSTPT-----          |
| HvMLO     | 424 | RNTAKEKKKVRDMDLMAQMGIDATPSRGSPMPSPRGSSPVHLLHK-----GMGRSDDPQSSTPT-----          |
| OsMLO2    | 449 | RKTAREKKKVRDAEFLAQMSGDTPSRGS-----SPVHLLHK-----QVRSEDPPSAPA-----                |

  

|           |     |                                                                                 |
|-----------|-----|---------------------------------------------------------------------------------|
| AtMLO2    | 520 | --HHEHQFWDPEHQHET-----AETST--H-HS-LAHESSEP--VLASVELPP----IRTSK-----SLRDFSFKK--  |
| AtMLO6    | 518 | ----DFDSDPEHQHET-----AETSNSNH-RSRFGEESSEKFFVSSSVLPPGPGQIRTQHEISTISLRDFSFKR--    |
| AtMLO12   | 517 | --HGHHQFWDPEHQHET-----AETSNSNH-RSRFGEESSEKFFVSSSVLPPGPGQIRTQHEISTISLRDFSFKR--   |
| PsMLO1    | 510 | --DYKNEQWDIEGE-----GPTSLRNDQT--GQHE-IQIAGVESFSTELPVIR-HE--STSGSKDFSFEKRRH       |
| MtMLO1    | 508 | --NYENEQWDVEGG-----GSTSPRNNQT--VASE-IEIPIVESFSTELPVSVR-HEIGTSSSKDFSFEKRRH       |
| LjMLO1    | 488 | --NYETEQWYLE-----PNSPSNHTR--GHDQTLQMQVLGSSATEFSPAETH-HEI-TPIGLPEFSDFKAP         |
| CaMLO2    | 475 | --NVENEGWANETS-----TENK--DHQEEQILQHASTSMQHPHTDQHQI--EIAMSDFTFGNK-               |
| SlMLO1    | 468 | --NVENEGWANEN-----QEGEILQHASTD--H--NKQI--EITMSDFTFGNK-                          |
| NtMLO1    | 465 | --NAENEGWANEIP-----TSPRQIENIKDDHQEGEI--HASSSV-----HQV--EIAMSDFTFGNK-            |
| SmMLO1    | 475 | --NVENEGWANEIS-----TDNKDYQEGHASTSVRPP--HAHQIIEITMSDFTFGNK-                      |
| CsaMLO8   | 440 | LSDAEPDRWEELPPSSHHSRAPHHDNHQDQEQESETIIEQEMTVQGPSSSETGSIIRPARPHQEIIRTP-SDFSFAKX- |
| CsaMLO1   | 520 | -----SPSPSRH-----VDGSSSSQPHVEMGGYEKDPVSSSSQVDPVQPSNRNQHIEIHGGPKDFSFDR--         |
| MdMLO19   | 530 | FHHQDNLTSWQQGTN-----MEGQKEEISAHGPNASNALGAYGSIITQHEIQIHSAAITFEK--                |
| TaMLO_B1a | 484 | -----SPRAMEEARDMPVVA-----HPVHRLNPADRRRSVSSSALDAD-----IPSADFSFS-Q-               |
| TaMLO_A1b | 484 | -----SPRAMEEARDMPVVA-----HPVHRLNPADRRRSVSSSALDAD-----IPSADFSFS-Q-               |
| TaMLO_D1  | 485 | -----SPRAMEEARDMPVVA-----HPVHRLNPADRRRSVSSSALDAD-----IPSADFSFS-Q-               |
| HvMLO     | 483 | -----SPRAMEEARDMPVVA-----HPVHRLNPADRRRSVSSSALDAD-----IPSADFSFS-Q-               |
| OsMLO2    | 500 | -----SPGFAGEARDMPVPAVVRPHGFNRTPD-KKRAASSAIAQVD-----IADSDFSFSVQ-                 |

|           |     |                                              |
|-----------|-----|----------------------------------------------|
| AtMLO2    | 573 | -----K-----                                  |
| AtMLO6    | 583 | -----R-----                                  |
| AtMLO12   | 576 | -----K-----                                  |
| PsMLO1    | 568 | -----KRHLGSN                                 |
| MtMLO1    | 568 | -----KRHIGSN                                 |
| LjMLO1    | 545 | -----KAPTSRE                                 |
| CaMLO2    | 527 | -----NK---X-                                 |
| CsaMLO8   | 516 | -----KX-----                                 |
| CsaMLO1   | 580 | -----R---VEX                                 |
| SlMLO1    | 506 | -----NK---X-                                 |
| NtMLO1    | 516 | -----NK---MS                                 |
| SmMLO1    | 522 | -----NK-----                                 |
| MdMLO19   | 586 | -----K---TERS                                |
| TaMLO_B1a | 533 | -----Q---G                                   |
| TaMLO_A1b | 533 | -----Q---G                                   |
| TaMLO1-D1 | 534 | GXD <del>K</del> FLYXCXSNVXPTXDVMIRTIRNTNFYX |
| HvMLO     | 532 | -----Q-----G                                 |
| OsMLO2    | 553 | -----VQ---R                                  |

**Figure S2.** Protein alignment of functionally characterized MLO sequences of *Arabidopsis thaliana* AtMLO2, -6, and -12 (GenBank accession numbers NP172598, NP176350, and NP565902) [17], *Pisum sativum* (pea) PsMLO1 (GenBank accession number FJ463618) [1], *Medicago truncatula* (barrel clover) MtMLO1 (GenBank accession number HQ446457) [1], *Lotus japonicus* LjMLO1 (GenBank accession number AY967410) [1], *Capsicum annuum* (pepper) CaMLO2 (GenBank accession number AFH68055) [23], *Cucumis sativus* (cucumber) CsaMLO1 and -8 (GenBank accession numbers Csa1M085890.1 and Csa5M623470.1) [12,14], *Solanum lycopersicum* (tomato) SlMLO1 (GenBank accession number NP001234814) [7], *Nicotiana tabacum* (tobacco) NtMLO1 (GenBank accession number KM244716) [15], *S. melongena* (eggplant) SmMLO1 (GenBank accession number KM244717) [24], *Malus domestica* (apple) MdMLO19 (GenBank accession number MDP0000168714) [10], *Triticum aestivum* (wheat) TaMLO-A1b, TaMLO-B1a, and TaMLO-D1 (GenBank accession numbers AX063298, AF361932, and AX063296) [25,26], *Hordeum vulgare* (barley) HvMLO (GenBank accession number Z83834) [27] and *Oryza sativa* (rice) OsMLO2 (GenBank accession number AF384030) [25]. Highlighted in green and in light blue are the conserved amino acids among the whole MLO family indicated by Kusch et al. [28] and by Elliott et al. [29], respectively. Amino acids highlighted in gray refer to the ones reported to be under negative selection by Appiano et al. [30]. Letters displayed in green, light blue or gray indicate synonymous amino acid exchanges in each of three categories above described. Letters in red bold indicate amino acids identified in *mlo*-mutants for each of the plant species described above. Black lines indicate the position of the transmembrane domains which have been numbered with romans numbers.

## References

- Humphry, M.; Reinstädler, A.; Ivanov, S.; Bisseling, T.; Panstruga, R. Durable broad-spectrum powdery mildew resistance in pea *er1* plants is conferred by natural loss-of-function mutations in PsMLO1. *Mol. Plant Pathol.* **2011**, *12*, 866–878, doi:10.1111/j.1364-3703.2011.00718.x.
- Pavan, S.; Schiavulli, A.; Appiano, M.; Marcotrigiano, A.R.; Cillo, F.; Visser, R.G.F.; Bai, Y.; Lotti, C.; Ricciardi, L. Pea powdery mildew *er1* resistance is associated to loss-of-function mutations at a MLO homologous locus. *Theor. Appl. Genet.* **2011**, *123*, 1425–1431, doi:10.1007/s00122-011-1677-6.
- Sun, S.; Fu, H.; Wang, Z.; Duan, C.; Zong, X.; Zhu, Z. Discovery of a Novel *er1* Allele Conferring Powdery Mildew Resistance in Chinese Pea (*Pisum sativum* L.) Landraces. *PLoS ONE* **2016**, *11*, e0147624, doi:10.1371/journal.pone.0147624.
- Santo, T.; Rashkova, M.; Alabaça, C.; Leitão, J. The ENU-induced powdery mildew resistant mutant pea (*Pisum sativum* L.) lines *S(er1mut1)* and *F(er1mut2)* harbour early stop codons in the *PsMLO1* gene. *Mol. Breed.* **2013**, *32*, 723–727, doi:10.1007/s11032-013-9889-x.
- Jiang, P.; Chen, Y.; Wilde, H.D. Identification and mutagenesis of disease susceptibility genes of *Petunia hybrida*. *Plant Cell, Tissue Organ. Cult.* **2016**, *126*, 117–125, doi:10.1007/s11240-016-0982-9.
- Kaufmann, H.; Qiu, X.; Wehmeyer, J.; Debener, T. Isolation, Molecular Characterization, and Mapping of Four Rose MLO Orthologs. *Front. Plant Sci.* **2012**, *3*, 244, doi:10.3389/fpls.2012.00244.
- Bai, Y.; Pavan, S.; Zheng, Z.; Zappel, N.F.; Reinstädler, A.; Lotti, C.; De Giovanni, C.; Ricciardi, L.; Lindhout, P.; Visser, R.; et al. Naturally Occurring Broad-Spectrum Powdery Mildew Resistance in a Central American Tomato Accession Is Caused by Loss of *Mlo* Function. *Mol. Plant Microbe Interact.* **2008**, *21*, 30–39, doi:10.1094/mpmi-21-1-0030.
- Kim, D.; Jin, B.; Je, B.I.; Choi, Y.; Kim, B.S.; Jung, H.J.; Nou, I.S.; Park, Y. Development of DNA markers for *Slmlo1.1*, a new mutant allele of the powdery mildew resistance gene *SlMLO1* in tomato (*Solanum lycopersicum*). *Genome* **2018**, *61*, 703–12, doi:10.1139/gen-2018-0114.
- Nekrasov, V.; Wang, C.; Win, J.; Lanz, C.; Weigel, D.; Kamoun, S. Rapid generation of a transgene-free powdery mildew resistant tomato by genome deletion. *Sci. Rep.* **2017**, *7*, 1–6, doi:10.1038/s41598-017-00578-x.
- Pessina, S.; Angeli, D.; Martens, S.; Visser, R.G.; Bai, Y.; Salamini, F.; Velasco, R.; Schouten, H.J.; Malnoy, M. The knock-down of the expression of *MdMLO19* reduces susceptibility to powdery mildew (*Podosphaera leucotricha*) in apple (*Malus domestica*). *Plant Biotechnol. J.* **2016**, *14*, 2033–2044, doi:10.1111/pbi.12562.



11. Wan, D.-Y.; Guo, Y.; Cheng, Y.; Hu, Y.; Xiao, S.; Wang, Y.; Wen, Y.-Q. CRISPR/Cas9-mediated mutagenesis of *VvMLO3* results in enhanced resistance to powdery mildew in grapevine (*Vitis vinifera*). *Hortic. Res.* **2020**, *7*, 1–14, doi:10.1038/s41438-020-0339-8.
12. Berg, J.A.; Appiano, M.; Bijsterbosch, G.; Visser, R.G.F.; Schouten, H.J.; Bai, Y. Functional characterization of cucumber (*Cucumis sativus* L.) Clade V *MLO* genes. *BMC Plant Biol.* **2017**, *17*, 1–15, doi: 10.1186/s12870-017-1029-z
13. Nie, J.; Wang, Y.; He, H.; Guo, C.; Zhu, W.; Pan, J.; Li, D.; Lian, H.; Pan, J.; Cai, R. Loss-of-function mutations in *CsMLO1* confer durable powdery mildew resistance in cucumber (*Cucumis sativus* L.). *Front. Plant Sci.* **2015**, *6*, 1155. doi.org/10.3389/fpls.2015.01155
14. Berg, J.A.; Appiano, M.; Martínez, M.S.; Hermans, F.W.K.; Vriezen, W.H.; Visser, R.G.F.; Bai, Y.; Schouten, H.J. A transposable element insertion in the susceptibility gene *CsaMLO8* results in hypocotyl resistance to powdery mildew in cucumber. *BMC Plant Biol.* **2015**, *15*, 243, doi:10.1186/s12870-015-0635-x.
15. Appiano, M.; Pavan, S.; Catalano, D.; Zheng, Z.; Bracuto, V.; Lotti, C.; Visser, R.G.F.; Ricciardi, L.; Bai, Y. Identification of candidate *MLO* powdery mildew susceptibility genes in cultivated Solanaceae and functional characterization of tobacco *NtMLO1*. *Transgenic Res.* **2015**, *24*, 847–858, doi: 10.1007/s11248-015-9878-4
16. Fujimura, T.; Sato, S.; Tajima, T.; Arai, M. Powdery mildew resistance in the Japanese domestic tobacco cultivar Kokubu is associated with aberrant splicing of *MLO* orthologues. *Plant Pathol.* **2016**, *65*, 1358–1365, doi:10.1111/ppa.12498.
17. Consonni, C.; Humphry, M.E.; Hartmann, H.A.; Livaja, M.; Durner, J.; Westphal, L.; Vogel, J.; Lipka, V.; Kemmerling, B.; Schulze-Lefert, P.; et al. Conserved requirement for a plant host cell protein in powdery mildew pathogenesis. *Nat. Genet.* **2006**, *38*, 716–720, doi:10.1038/ng1806.
18. Reinstädler, A.; Müller, J.; Czembor, J.H.; Piffanelli, P.; Panstruga, R. Novel induced *mlo* mutant alleles in combination with site-directed mutagenesis reveal functionally important domains in the heptahelical barley *Mlo* protein. *BMC Plant Biol.* **2010**, *10*, 31, doi:10.1186/1471-2229-10-31.
19. Ge, X.; Deng, W.; Lee, Z.Z.; Lopez-Ruiz, F.J.; Schweizer, P.; Ellwood, S.R. Tempered *mlo* broad-spectrum resistance to barley powdery mildew in an Ethiopian landrace. *Sci. Rep.* **2016**, *6*, 1–10, doi: 10.1038/srep29558
20. Acevedo-Garcia, J.; Spencer, D.; Thieron, H.; Reinstädler, A.; Hammond-Kosack, K.; Phillips, A.L.; Panstruga, R. *mlo*-based powdery mildew resistance in hexaploid bread wheat generated by a non-transgenic TILLING approach. *Plant Biotechnol. J.* **2016**, *15*, 367–378, doi:10.1111/pbi.12631.
21. Wang, Y.; Cheng, X.; Shan, Q.; Zhang, Y.; Liu, J.; Gao, C.; Qiu, J.-L. Simultaneous editing of three homoeoalleles in hexaploid bread wheat confers heritable resistance to powdery mildew. *Nat. Biotechnol.* **2014**, *32*, 947–951, doi:10.1038/nbt.2969.
22. Zheng, Z.; Appiano, M.; Pavan, S.; Bracuto, V.; Ricciardi, L.; Visser, R.G.F.; Wolters, A.-M.A.; Bai, Y. Genome-Wide Study of the Tomato *SIMLO* Gene Family and Its Functional Characterization in Response to the Powdery Mildew Fungus *Oidium neolycopersici*. *Front. Plant Sci.* **2016**, *7*, 380, doi:10.3389/fpls.2016.00380.
23. Zheng, Z.; Nonomura, T.; Appiano, M.; Pavan, S.; Matsuda, Y.; Toyoda, H.; Wolters, A.M.A.; Visser, R.G.F.; Bai, Y. Loss of function in *Mlo* orthologs reduces susceptibility of pepper and tomato to powdery mildew disease caused by *Leveillula taurica*. *PLoS ONE* **2013**, *8*, e70723, doi: 10.1371/journal.pone.0070723
24. Bracuto, V.; Appiano, M.; Ricciardi, L.; Göl, D.; Visser, R.G.F.; Bai, Y.; Pavan, S. Functional characterization of the powdery mildew susceptibility gene *SmMLO1* in eggplant (*Solanum melongena* L.). *Transgenic Res.* **2017**, *26*, 323–330, doi: 10.1007/s11248-016-0007-9
25. Elliott, C.; Zhou, F.; Spielmeier, W.; Panstruga, R.; Schulze-Lefert, P. Functional conservation of wheat and rice *Mlo* orthologs in defense modulation to the powdery mildew fungus. *Mol. Plant Microbe Interact.* **2002**, *15*, 1069–1077, doi: 10.1094/MPMI.2002.15.10.1069
26. Várallyay, É.; Giczey, G.; Burgyn, J. Virus-induced gene silencing of *Mlo* genes induces powdery mildew resistance in *Triticum aestivum*. *Arch. Virol.* **2012**, *157*, 1345–1350, doi: 10.1007/s00705-012-1286-y
27. Büschges, R.; Hollricher, K.; Panstruga, R.; Simons, G.; Wolter, M.; Frijters, A.; van Daelen, R.; van der Lee, T.; Diergaarde, P.; Groenendijk, J.; et al. The Barley *Mlo* Gene: A Novel Control Element of Plant Pathogen Resistance. *Cell* **1997**, *88*, 695–705, doi:10.1016/s0092-8674(00)81912-1.
28. Kusch, S.; Pesch, L.; Panstruga, R. Comprehensive Phylogenetic Analysis Sheds Light on the Diversity and Origin of the *MLO* Family of Integral Membrane Proteins. *Genome Biol. Evol.* **2016**, *8*, 878–895, doi:10.1093/gbe/evw036.
29. Elliott, C.; Müller, J.; Miklis, M.; Bhat, R.A.; Schulze-Lefert, P.; Panstruga, R. Conserved extracellular cysteine residues and cytoplasmic loop–loop interplay are required for functionality of the heptahelical *MLO* protein. *Biochem. J.* **2005**, *385*, 243–254, doi:10.1042/bj20040993.
30. Appiano, M.; Catalano, D.; Martínez, M.S.; Lotti, C.; Zheng, Z.; Visser, R.G.F.; Ricciardi, L.; Bai, Y.; Pavan, S. Monocot and dicot *MLO* powdery mildew susceptibility factors are functionally conserved in spite of the evolution of class-specific molecular features. *BMC Plant Biol.* **2015**, *15*, 1–10, doi:10.1186/s12870-015-0639-6.
